# Supplementary material
Source: publisher figshare collection journal article supplement (https://asha.figshare.com/ndownloader/files/23441912)
Supplement: Supplementary file 1 [file 23441912]

**Supplemental Material S1.** Characteristics of individuals missing depression symptoms or perceived anxiety responses. Data are shown as n, %. Mean and standard error are displayed for age as well. All results are weighted using the NHANES 2009–2012 exam weights.

| Characteristic                   | Sample Size (n=5550) | Not Missing (n=4829) | Missing Depression <u>OR</u> Anxiety (n=721) |
|----------------------------------|----------------------|----------------------|----------------------------------------------|
| All                              | 5550                 | 4829 (87%)           | 721 (13%)                                    |
| Sex                              |                      |                      |                                              |
| Male                             | 2732                 | 91% (89–93%)         | 9% (7–11%)                                   |
| Female                           | 2818                 | 87% (85–90%)         | 13% (10–15%)                                 |
| Age                              |                      |                      |                                              |
| 20–39 years                      | 1876                 | 88% (85–91%)         | 12% (9–15%)                                  |
| 40–59 years                      | 1754                 | 88% (86–91%)         | 12% (9–14%)                                  |
| 60–79 years                      | 1525                 | 94% (92–96%)         | 6% (4–8%)                                    |
| 80+ years                        | 395                  | 84% (78–90%)         | 16% (10–22%)                                 |
| Race/Ethnicity                   |                      |                      |                                              |
| Non-Hispanic White               | 2184                 | 92% (89–94%)         | 8% (6–11%)                                   |
| Non-Hispanic Black               | 1387                 | 86% (84–88%)         | 14% (12–16%)                                 |
| Mexican American                 | 588                  | 84% (80–88%)         | 16% (12–20%)                                 |
| Other Hispanic                   | 524                  | 84% (79–89%)         | 16% (11–21%)                                 |
| Other                            | 867                  | 83% (80–87%)         | 17% (13–20%)                                 |
| Education                        |                      |                      |                                              |
| < High School                    | 1338                 | 84% (79–88%)         | 16% (12–21%)                                 |
| High School Graduate             | 1164                 | 91% (88–93%)         | 9% (7–12%)                                   |
| > High School                    | 3045                 | 90% (89–92%)         | 10% (8–11%)                                  |
| Income (% Federal Poverty Level) |                      |                      |                                              |
| ≤100%                            | 1696                 | 82% (79–85%)         | 18% (15–21%)                                 |
| 101–200%                         | 1324                 | 90% (87–92%)         | 10% (8–13%)                                  |
| >200%                            | 2530                 | 92% (90–94%)         | 8% (6–10%)                                   |
| Marital Status                   |                      |                      |                                              |
| Married                          | 2712                 | 88% (87–91%)         | 11% (9–13%)                                  |
| Widowed/Divorced/Separated       | 1273                 | 90% (88–91%)         | 10% (9–12%)                                  |
| Never Married                    | 1143                 | 90% (88–92%)         | 10% (8–12%)                                  |
| Living with Partner              | 420                  | 89% (85–93%)         | 11% (7–15%)                                  |
| Veteran Status                   |                      |                      |                                              |
| Veteran                          | 625                  | 91% (88–94%)         | 9% (6–12%)                                   |
| Non-Veteran                      | 4925                 | 89% (87–91%)         | 11% (9–13%)                                  |
| Occupational Noise Exposure      |                      |                      |                                              |
| Yes                              | 1870                 | 92% (90–93%)         | 8% (7–10%)                                   |
| No                               | 3678                 | 88% (86–90%)         | 12% (10–14%)                                 |
| Self-Report Hearing Ability      |                      |                      |                                              |
| Excellent/Good                   | 4216                 | 88% (87–90%)         | 12% (10–13%)                                 |
| Little Trouble                   | 825                  | 94% (91–96%)         | 6% (4–9%)                                    |
| Moderate Trouble                 | 315                  | 91% (87–96%)         | 9% (4–13%)                                   |
| Severe Trouble/Deaf              | 192                  | 90% (85–94%)         | 10% (6–15%)                                  |
| General Health Status            |                      |                      |                                              |
| Excellent/Very Good              | 1836                 | 100% (99–100%)       | 0% (0–1%)                                    |

Supplemental material, Reavis, et al., “Prevalence of Self-Reported Depression Symptoms and Perceived Anxiety Among Community-Dwelling U.S. Adults Reporting Tinnitus,” *Perspectives of the ASHA Special Interest Groups*, [https://doi.org/10.1044/2020\\_PERSP-19-00178](https://doi.org/10.1044/2020_PERSP-19-00178)

|                        |      |               |              |
|------------------------|------|---------------|--------------|
| Good                   | 1951 | 99% (99–100%) | 1% (0–1%)    |
| Fair                   | 903  | 99% (99–100%) | 1% (0–1%)    |
| Poor                   | 179  | 96% (91–100%) | 4% (0–9%)    |
| Smoking                |      |               |              |
| Never                  | 3137 | 88% (86–90%)  | 12% (10–14%) |
| Former                 | 1331 | 92% (90–94%)  | 8% (6–10%)   |
| Current                | 1076 | 89% (86–93%)  | 11% (7–14%)  |
| Hypertension           |      |               |              |
| Yes                    | 2079 | 91% (89–93%)  | 9% (7–11%)   |
| No                     | 3464 | 89% (87–90%)  | 11% (10–13%) |
| Hyperlipidemia         |      |               |              |
| Yes                    | 1861 | 92% (90–94%)  | 8% (6–10%)   |
| No                     | 3550 | 88% (86–90%)  | 12% (10–14%) |
| Diabetes               |      |               |              |
| Yes                    | 700  | 92% (90–94%)  | 8% (6–10%)   |
| No                     | 4723 | 89% (87–91%)  | 11% (9–13%)  |
| Borderline             | 123  | 96% (94–99%)  | 4% (1–6%)    |
| Cardiovascular Disease |      |               |              |
| Yes                    | 608  | 91% (88–94%)  | 9% (6–12%)   |
| No                     | 4942 | 89% (87–91%)  | 11% (9–13%)  |
| Cancer History         |      |               |              |
| Yes                    | 545  | 92% (89–95%)  | 8% (5–11%)   |
| No                     | 5000 | 89% (87–91%)  | 11% (9–13%)  |
| Tinnitus               |      |               |              |
| Yes                    | 767  | 93% (91–96%)  | 7% (4–9%)    |
| No                     | 4783 | 89% (87–90%)  | 11% (10–13%) |
